# Supplementary material
Source: Copernicus journal article supplement (doi:10.5194/nhess-26-2111-2026)
Supplement: Supplementary file 1 [file nhess-26-2111-2026-supplement.pdf]

Supplement of Nat. Hazards Earth Syst. Sci., 26, 2111–2132, 2026  
<https://doi.org/10.5194/nhess-26-2111-2026-supplement>  
Public domain. CC0 1.0.

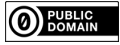

Natural Hazards  
and Earth System  
Sciences  Open Access

*Supplement of*

## **An improved empirical model for predicting postfire debris-flow volume in the western United States**

**Alexander N. Gorr et al.**

*Correspondence to:* Alexander N. Gorr (agorr@usgs.gov)

The copyright of individual parts of the supplement might differ from the article licence.

**Table S1:** Additional fire information

| <b>Fire</b>      | <b>Centroid<br/>Latitude</b> | <b>Centroid<br/>Longitude</b> | <b>Mean Annual<br/>Precip. (mm)<sup>a</sup></b> | <b>Mean Annual<br/>Temp. (°C)<sup>a</sup></b> | <b>Fire Size (km<sup>2</sup>)</b> |
|------------------|------------------------------|-------------------------------|-------------------------------------------------|-----------------------------------------------|-----------------------------------|
| Apple            | 34.024895                    | -116.857495                   | 733                                             | 10.9                                          | 131.0                             |
| Bush             | 33.758734                    | -111.371074                   | 601                                             | 13.9                                          | 860.1                             |
| Buzzard          | 33.722812                    | -108.497297                   | 580                                             | 8.7                                           | 206.1                             |
| Cameron Peak     | 40.605902                    | -105.595946                   | 471                                             | 3.7                                           | 845.4                             |
| Carmel           | 36.417104                    | -121.654675                   | 619                                             | 14.6                                          | 29.5                              |
| Cedar            | 32.93813                     | -116.76964                    | 396                                             | 17.6                                          | 1,086                             |
| Coal Seam        | 39.568709                    | -107.372855                   | 524                                             | 7.3                                           | 48.6                              |
| Cub Creek 2      | 48.66542                     | -120.163662                   | 609                                             | 6.3                                           | 301.9                             |
| Dixie            | 40.2107                      | -121.047088                   | 1018                                            | 8.9                                           | 3,965                             |
| El Dorado        | 34.093552                    | -116.956099                   | 626                                             | 11.7                                          | 90.2                              |
| Farmington       | 40.997006                    | -111.87113                    | 720                                             | 9.3                                           | 8.4                               |
| Flag             | 35.08463                     | -113.884319                   | 407                                             | 11.7                                          | 6.0                               |
| Frye             | 32.717119                    | -109.865303                   | 883                                             | 7.6                                           | 219.3                             |
| Grand Prix       | 34.200947                    | -117.52431                    | 1003                                            | 13.3                                          | 205.6                             |
| Grizzly Creek    | 39.598596                    | -107.199826                   | 540                                             | 6.9                                           | 124.3                             |
| Harvard          | 34.214363                    | -118.295978                   | 494                                             | 17.8                                          | 4.2                               |
| Hermit's Peak    | 35.67513                     | -105.4067                     | 534                                             | 8.6                                           | 1,425                             |
| Horseshoe 2      | 31.898296                    | -109.297553                   | 768                                             | 11.1                                          | 914.9                             |
| Horton           | 33.690072                    | -109.319985                   | 600                                             | 7.8                                           | 50.7                              |
| Missionary Ridge | 37.367666                    | -107.555805                   | 704                                             | 5.9                                           | 278.9                             |
| Monument         | 31.406257                    | -110.263289                   | 498                                             | 16.2                                          | 122.3                             |
| Mosquito         | 39.022366                    | -120.675334                   | 1343                                            | 14                                            | 315.1                             |
| Museum           | 35.262099                    | -111.61946                    | 638                                             | 7.5                                           | 8.1                               |
| Old              | 34.191134                    | -117.255873                   | 710                                             | 15.8                                          | 364.9                             |
| Pipeline         | 35.362787                    | -111.577509                   | 478                                             | 8                                             | 107.0                             |
| Sayre            | 34.323723                    | -118.467499                   | 518                                             | 17.6                                          | 45.4                              |
| Schultz          | 35.340236                    | -111.597928                   | 517                                             | 7.9                                           | 56.5                              |
| Station          | 34.333405                    | -118.123267                   | 643                                             | 15.7                                          | 669.2                             |
| Tadpole          | 32.95588                     | -108.248258                   | 630                                             | 11.2                                          | 46.1                              |
| Telegraph        | 33.250961                    | -110.825247                   | 604                                             | 14.4                                          | 757.8                             |
| Thomas           | 34.432918                    | -119.114304                   | 606                                             | 15.4                                          | 1,141                             |
| Three Rivers     | 33.417712                    | -105.834773                   | 811                                             | 7.5                                           | 25.7                              |
| Wallow           | 33.802682                    | -109.301473                   | 607                                             | 7.2                                           | 2,281                             |
| Woodbury         | 33.504149                    | -111.181512                   | 556                                             | 15.4                                          | 527.1                             |

---

<sup>a</sup>Data from PRISM Climate Group (2025)

---

**Table S2:** Postfire debris-flow volumes from data-limited regions

| <b>Region</b>       | <b>Fire</b> | <b>Watershed</b>             | <b>Volume (m<sup>3</sup>)</b> | <b>Deposit Latitude</b> | <b>Deposit Longitude</b> |
|---------------------|-------------|------------------------------|-------------------------------|-------------------------|--------------------------|
| Northern California | Carmel      | Carmel 1 <sup>a</sup>        | 24                            | 36.445615               | -121.710146              |
| Northern California | Carmel      | Carmel 2 <sup>a</sup>        | 30                            | 36.445619               | -121.709744              |
| Northern California | Carmel      | Carmel 3 <sup>a</sup>        | 80                            | 36.444445               | -121.707822              |
| Northern California | Carmel      | Carmel 4 <sup>a</sup>        | 150                           | 36.443973               | -121.707518              |
| Northern California | Carmel      | Carmel 5 <sup>a</sup>        | 61                            | 36.443002               | -121.70692               |
| Northern California | Carmel      | Carmel 7 <sup>a</sup>        | 171                           | 36.440594               | -121.705153              |
| Northern California | Carmel      | Carmel 8 <sup>a</sup>        | 35                            | 36.439575               | -121.703463              |
| Northern California | Carmel      | Carmel 9 <sup>a</sup>        | 38                            | 36.439367               | -121.703399              |
| Northern California | Carmel      | Carmel 10 <sup>a</sup>       | 990                           | 36.438628               | -121.704248              |
| Northern California | Carmel      | Carmel 12 <sup>a</sup>       | 182                           | 36.445364               | -121.711143              |
| Northern California | Carmel      | Carmel 13 <sup>a</sup>       | 721                           | 36.445167               | -121.708737              |
| Northern California | Dixie       | Murphy Creek <sup>b</sup>    | 2,044                         | 39.992102               | -121.281254              |
| Northern California | Dixie       | Murphy Creek <sup>b</sup>    | 13,356                        | 39.992102               | -121.281254              |
| Northern California | Mosquito    | Oxbow <sup>c</sup>           | 16,561                        | 39.000232               | -120.736177              |
| Utah                | Farmington  | Compton Bench N <sup>d</sup> | 1,515                         | 41.004600               | -111.892556              |
| Utah                | Farmington  | Compton Bench S <sup>d</sup> | 511                           | 41.004223               | -111.891726              |
| Utah                | Farmington  | Intake Basin <sup>d</sup>    | 597                           | 41.000702               | -111.878675              |
| Washington          | Cub Creek 2 | Boulder Creek <sup>c</sup>   | 4,932                         | 48.588038               | -120.119389              |
| Washington          | Cub Creek 2 | Butte Creek <sup>c</sup>     | 10,276                        | 48.633015               | -120.152082              |

<sup>a</sup>Data from Smith et al. (2021)

<sup>b</sup>Data from Thomas et al. (2023)

<sup>c</sup>Data from Gorr et al. (2025)

<sup>d</sup>Data from Gartner et al. (2008)

---

**Table S3:** Performance metrics for the final 29 models in the selection process, including  $R^2$  and root mean square error (RMSE)

| Rank           | Model                                                              | $R^2$ | RMSE |
|----------------|--------------------------------------------------------------------|-------|------|
| 1 <sup>a</sup> | $\ln V = 7.56 + 0.20i30_{rr} + 0.75 \ln a + 1.11\sqrt{mh_{50}}$    | 0.66  | 1.31 |
| 2              | $\ln V = 7.49 + 0.21i30_{rr} + 0.74 \ln a + 1.04\sqrt{b_{50}}$     | 0.66  | 1.31 |
| 3              | $\ln V = 7.61 + 0.18i60_{rr} + 0.76 \ln a + 1.10\sqrt{mh_{50}}$    | 0.66  | 1.31 |
| 4              | $\ln V = 7.54 + 0.18i60_{rr} + 0.74 \ln a + 1.03\sqrt{b_{50}}$     | 0.66  | 1.32 |
| 5              | $\ln V = 7.71 + 0.01i60 + 0.76 \ln a + 1.08\sqrt{mh_{50}}$         | 0.66  | 1.32 |
| 6              | $\ln V = 7.75 + 0.002i15 + 0.76 \ln a + 1.08\sqrt{mh_{50}}$        | 0.66  | 1.32 |
| 7              | $\ln V = 7.78 + 0.002i30 + 0.76 \ln a + 1.08\sqrt{mh_{50}}$        | 0.66  | 1.32 |
| 8              | $\ln V = 7.63 + 0.008i60 + 0.75 \ln a + 1.01\sqrt{b_{50}}$         | 0.66  | 1.32 |
| 9              | $\ln V = 7.67 + 0.003i15 + 0.74 \ln a + 1.01\sqrt{b_{50}}$         | 0.66  | 1.32 |
| 10             | $\ln V = 7.70 + 0.003i30 + 0.74 \ln a + 1.01\sqrt{b_{50}}$         | 0.66  | 1.32 |
| 11             | $\ln V = 7.62 + 0.20i30_{rr} + 0.77 \ln a + 0.96\sqrt{mh_{23}}$    | 0.65  | 1.33 |
| 12             | $\ln V = 7.66 + 0.17i60_{rr} + 0.78 \ln a + 0.96\sqrt{mh_{23}}$    | 0.65  | 1.33 |
| 13             | $\ln V = 7.76 + 0.007i60 + 0.78 \ln a + 0.94\sqrt{mh_{23}}$        | 0.65  | 1.33 |
| 14             | $\ln V = 7.69 + 0.007i60 + 0.77 \ln a + 0.87\sqrt{b_{23}}$         | 0.65  | 1.33 |
| 15             | $\ln V = -1.60 + 0.005i60 + 1.15 \ln mfp + 1.53\sqrt{b_{50}}$      | 0.63  | 1.38 |
| 16             | $\ln V = -1.51 + 0.001i15 + 1.14 \ln mfp + 1.53\sqrt{b_{50}}$      | 0.63  | 1.38 |
| 17             | $\ln V = -1.49 + 0.001i30 + 1.14 \ln mfp + 1.53\sqrt{b_{50}}$      | 0.63  | 1.38 |
| 18             | $\ln V = -1.92 + 0.15i30_{rr} + 1.19 \ln mfp + 1.64\sqrt{mh_{50}}$ | 0.63  | 1.38 |
| 19             | $\ln V = -1.92 + 0.12i60_{rr} + 1.19 \ln mfp + 1.63\sqrt{mh_{50}}$ | 0.62  | 1.38 |
| 20             | $\ln V = -1.89 + 0.004i60 + 1.20 \ln mfp + 1.61\sqrt{mh_{50}}$     | 0.62  | 1.38 |
| 21             | $\ln V = -1.80 + 0.0008i15 + 1.20 \ln mfp + 1.61\sqrt{mh_{50}}$    | 0.62  | 1.38 |
| 22             | $\ln V = -1.77 + 0.0004i30 + 1.20 \ln mfp + 1.60\sqrt{mh_{50}}$    | 0.62  | 1.38 |
| 23             | $\ln V = -1.47 + 0.005i60 + 1.13 \ln mfp + 1.43\sqrt{b_{23}}$      | 0.62  | 1.39 |
| 24             | $\ln V = -1.79 + 0.004i60 + 1.19 \ln mfp + 1.50\sqrt{mh_{23}}$     | 0.62  | 1.40 |
| 25             | $\ln V = -1.70 + 0.0007i15 + 1.18 \ln mfp + 1.50\sqrt{mh_{23}}$    | 0.61  | 1.40 |
| 26             | $\ln V = -1.67 + 0.0003i30 + 1.18 \ln mfp + 1.50\sqrt{mh_{23}}$    | 0.61  | 1.40 |
| 27             | $\ln V = 5.40 + 0.40i30_{rr} - 1.29 \ln M_R + 2.18\sqrt{b_{50}}$   | 0.60  | 1.42 |
| 28             | $\ln V = 5.46 + 0.41i30_{rr} - 1.41 \ln M_R + 2.34\sqrt{mh_{50}}$  | 0.60  | 1.43 |

$$\ln V = 5.47 + 0.35i60_{rr} - 1.26 \ln M_R + 2.20\sqrt{b_{50}}$$

---

 \*Selected model
 

---

**Table S4:** Definitions of variables used by the final 29 models

| Variable   | Definition                                                                                        |
|------------|---------------------------------------------------------------------------------------------------|
| $a$        | Watershed area (km <sup>2</sup> )                                                                 |
| $b_{23}$   | Watershed area burned with slopes $\geq 23^\circ$ (km <sup>2</sup> )                              |
| $b_{50}$   | Watershed area burned with slopes $\geq 50\%$ (km <sup>2</sup> )                                  |
| $i15$      | Peak 15-minute rainfall intensity (mm/h)                                                          |
| $i30$      | Peak 30-minute rainfall intensity (mm/h)                                                          |
| $i60$      | Peak 60-minute rainfall intensity (mm/h)                                                          |
| $i30_{rr}$ | $i30$ rainfall ratio                                                                              |
| $i60_{rr}$ | $i60$ rainfall ratio                                                                              |
| $mfp$      | Maximum flow path (m)                                                                             |
| $mh_{23}$  | Watershed area burned at moderate or high severity with slopes $\geq 23^\circ$ (km <sup>2</sup> ) |
| $mh_{50}$  | Watershed area burned at moderate or high severity with slopes $\geq 50\%$ (km <sup>2</sup> )     |
| $M_R$      | Melton ratio (ruggedness)                                                                         |
| $V$        | Debris-flow volume (m <sup>3</sup> )                                                              |

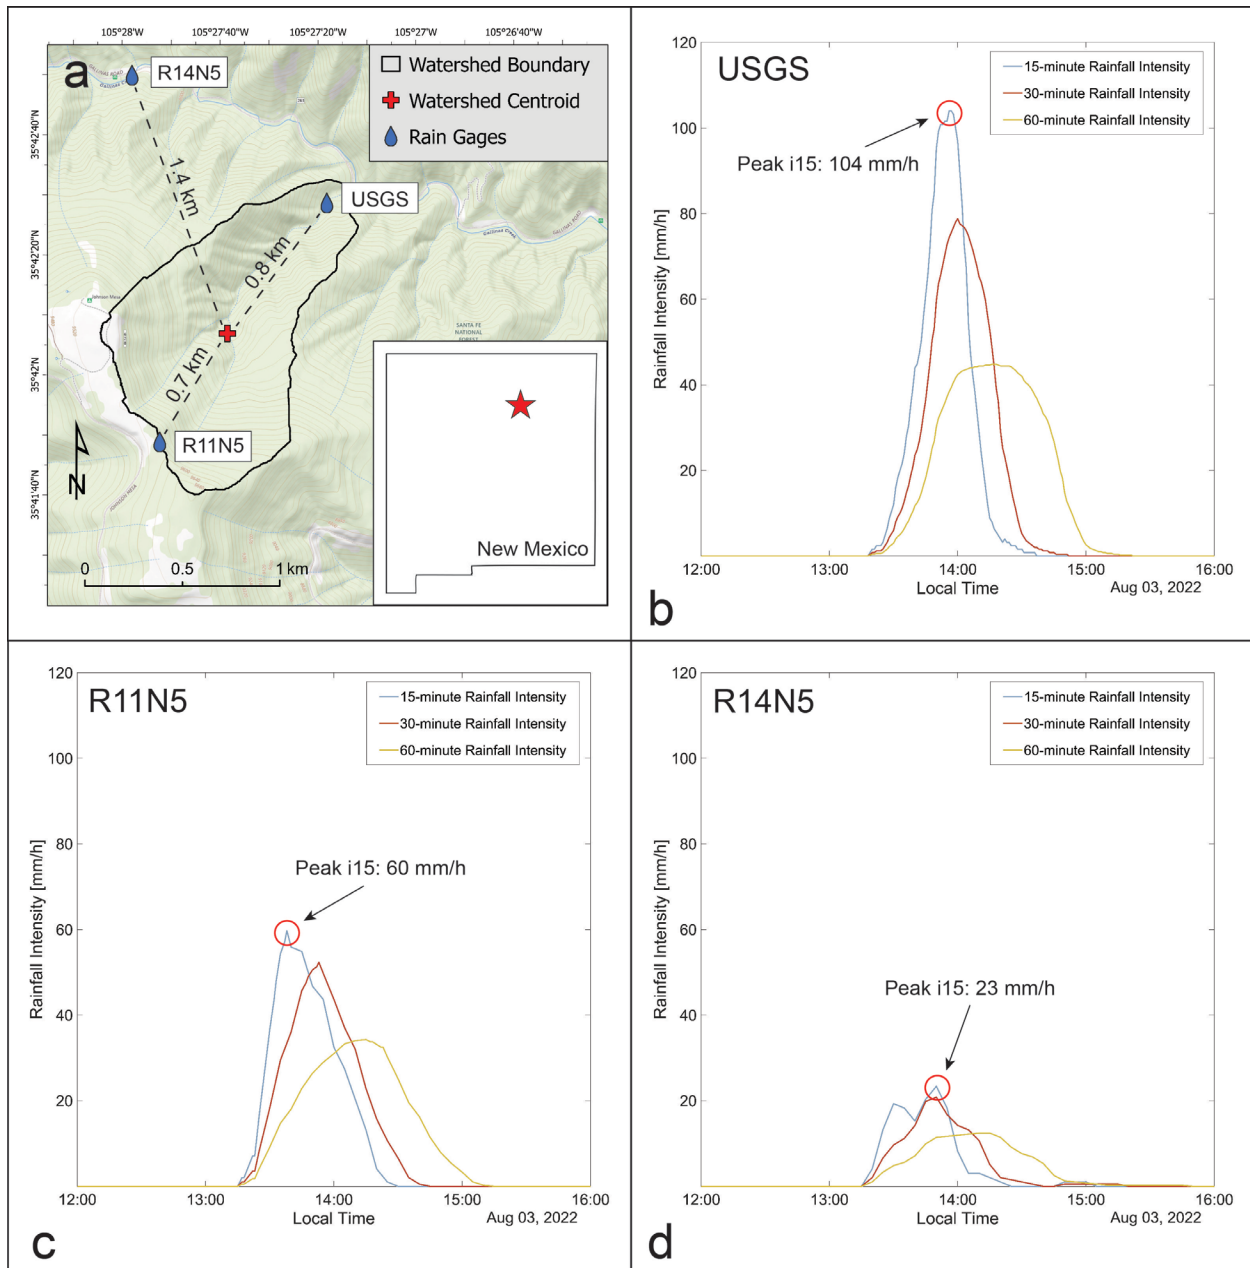

40 **Figure S1: Rainfall data from a 2022 debris-flow-producing storm, recorded by three separate rain gauges**  
 located in close proximity to one another in northern New Mexico, USA. (a) The locations of three rain gauges  
 (USGS, R11N5, and R14N5) in relation to a debris-flow-producing watershed. (b) The USGS gage, located near  
 the watershed outlet, recorded the highest 15-minute peak rainfall intensity (i15). (c) The R11N5 rain gage,  
 located at the drainage divide, recorded an i15 of 60 mm/h, roughly half as intense as the rainfall measured at  
 the USGS gage. (d) The lowest rainfall intensity was measured at the R145 gage, located 1.4 km from the  
 watershed centroid. The i15 recorded here was substantially lower than the rainfall intensities measured at  
 either the USGS or R11N5 gages. Basemap credits: United States Geological Survey (USGS) The National Map:  
 45 National Boundaries Dataset, 3D Elevation Program, Geographic Names Information System, National

50 **Hydrography Dataset, National Land Cover Database, National Structures Dataset, and National Transportation Dataset; USGS Global Ecosystems; U.S. Census Bureau TIGER/Line data, United States Forest Service Road data; Natural Earth Data; U.S. Department of State HIU; National Oceanic and Atmospheric Administration National Centers for Environmental Information.**

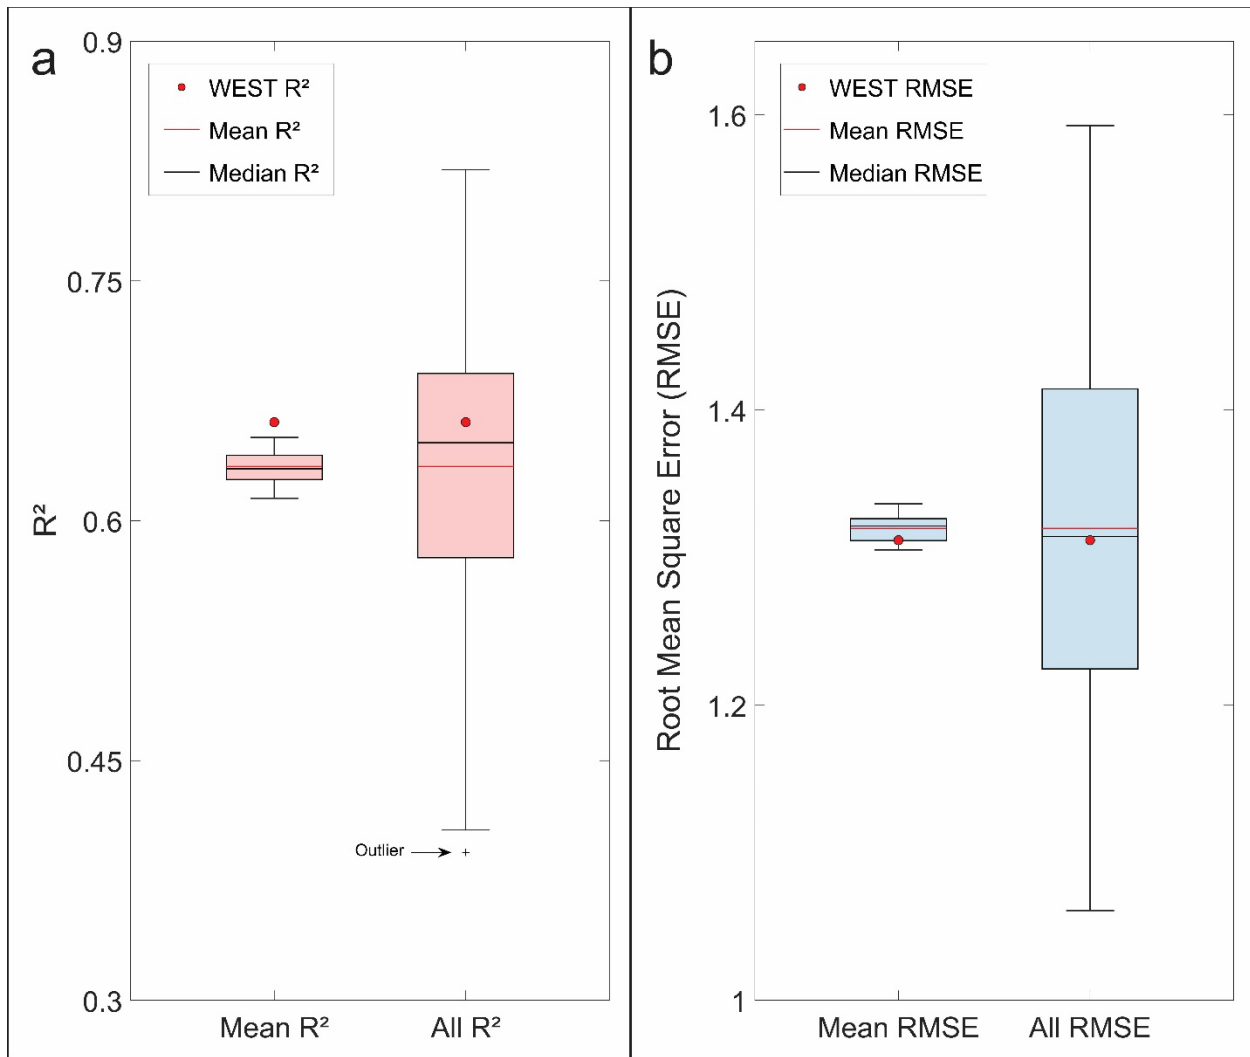

60

65

**Figure S2: Box plots showing the distribution of (a)  $R^2$  and (b) root mean square error (RMSE) values associated with the cross-validation analysis. The Mean  $R^2$  and RMSE box plots show the distribution of the 20 mean values of these metrics, one for each of 20 iterations of fivefold cross validation. The All  $R^2$  and RMSE box plots show the distribution of all 100 values of these metrics calculated as part of this analysis, one for all 100 folds associated with 20 iterations of fivefold cross validation. The  $R^2$  and RMSE values associated with the final western United States (WEST) model that was trained on the entire volume database are plotted for comparison.**

# Southern California

## Predicted / Observed Volume

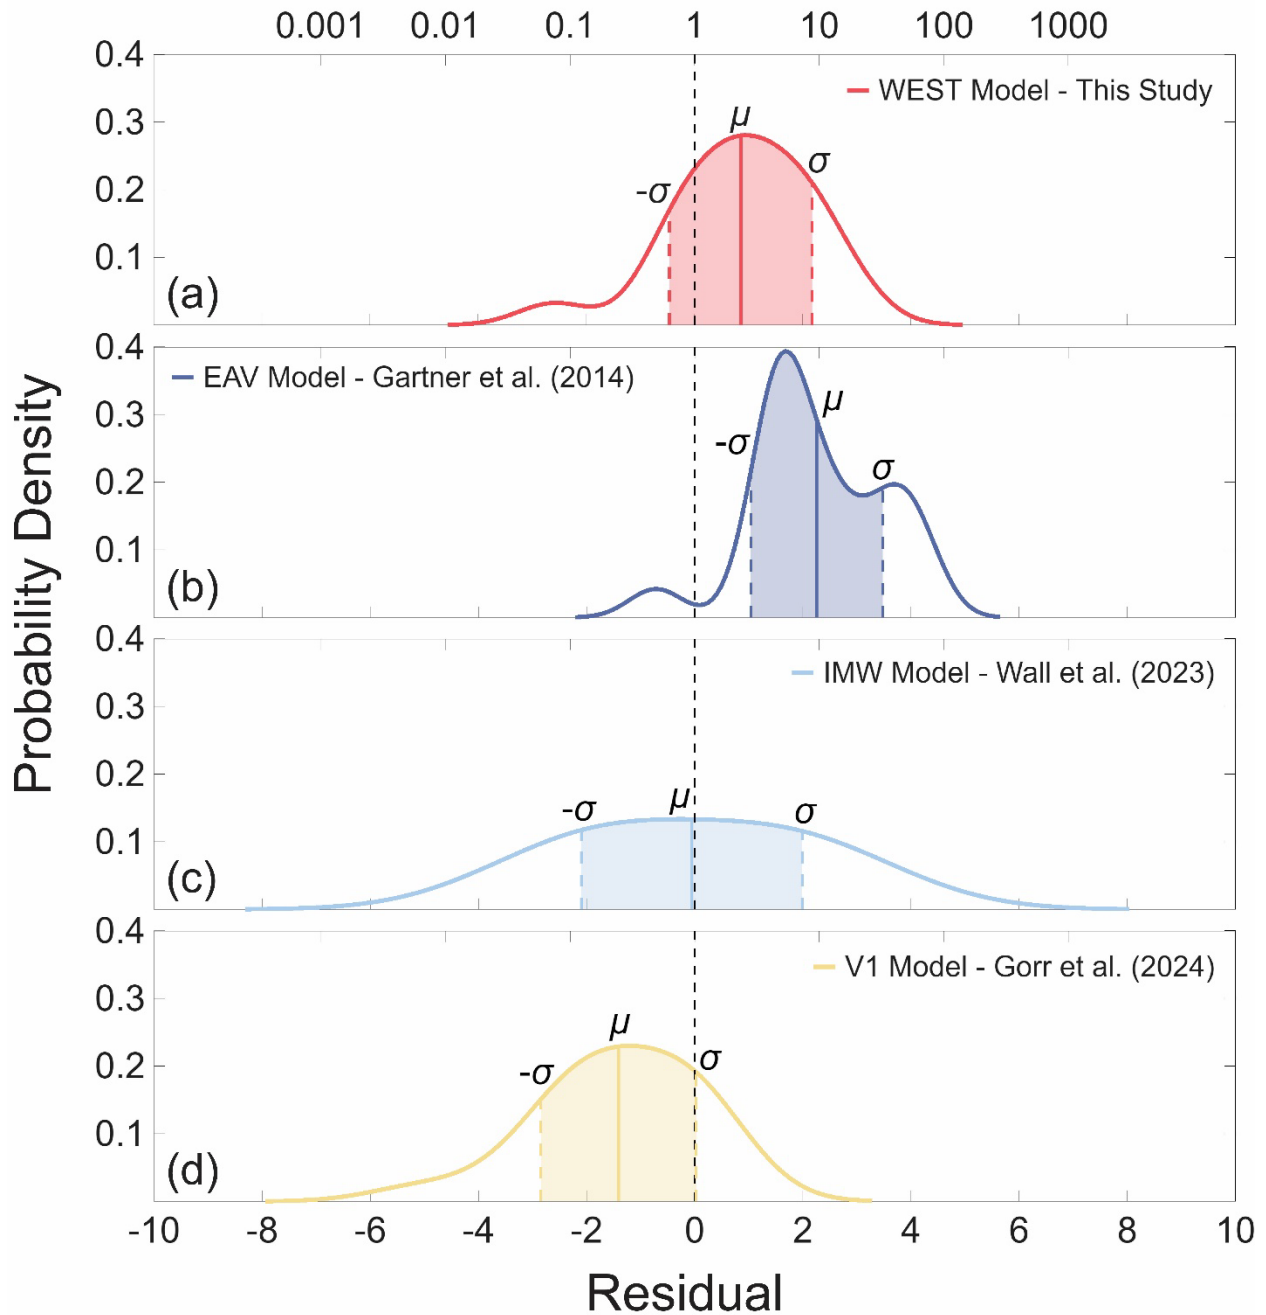

70 Figure S3: Probability density functions for the residuals of the (a) western United States (WEST), (b) Emergency Assessment volume (EAV), (c) Intermountain West (IMW), and (d) V1 models when applied to volume data from southern California.

# Intermountain West

## Predicted / Observed Volume

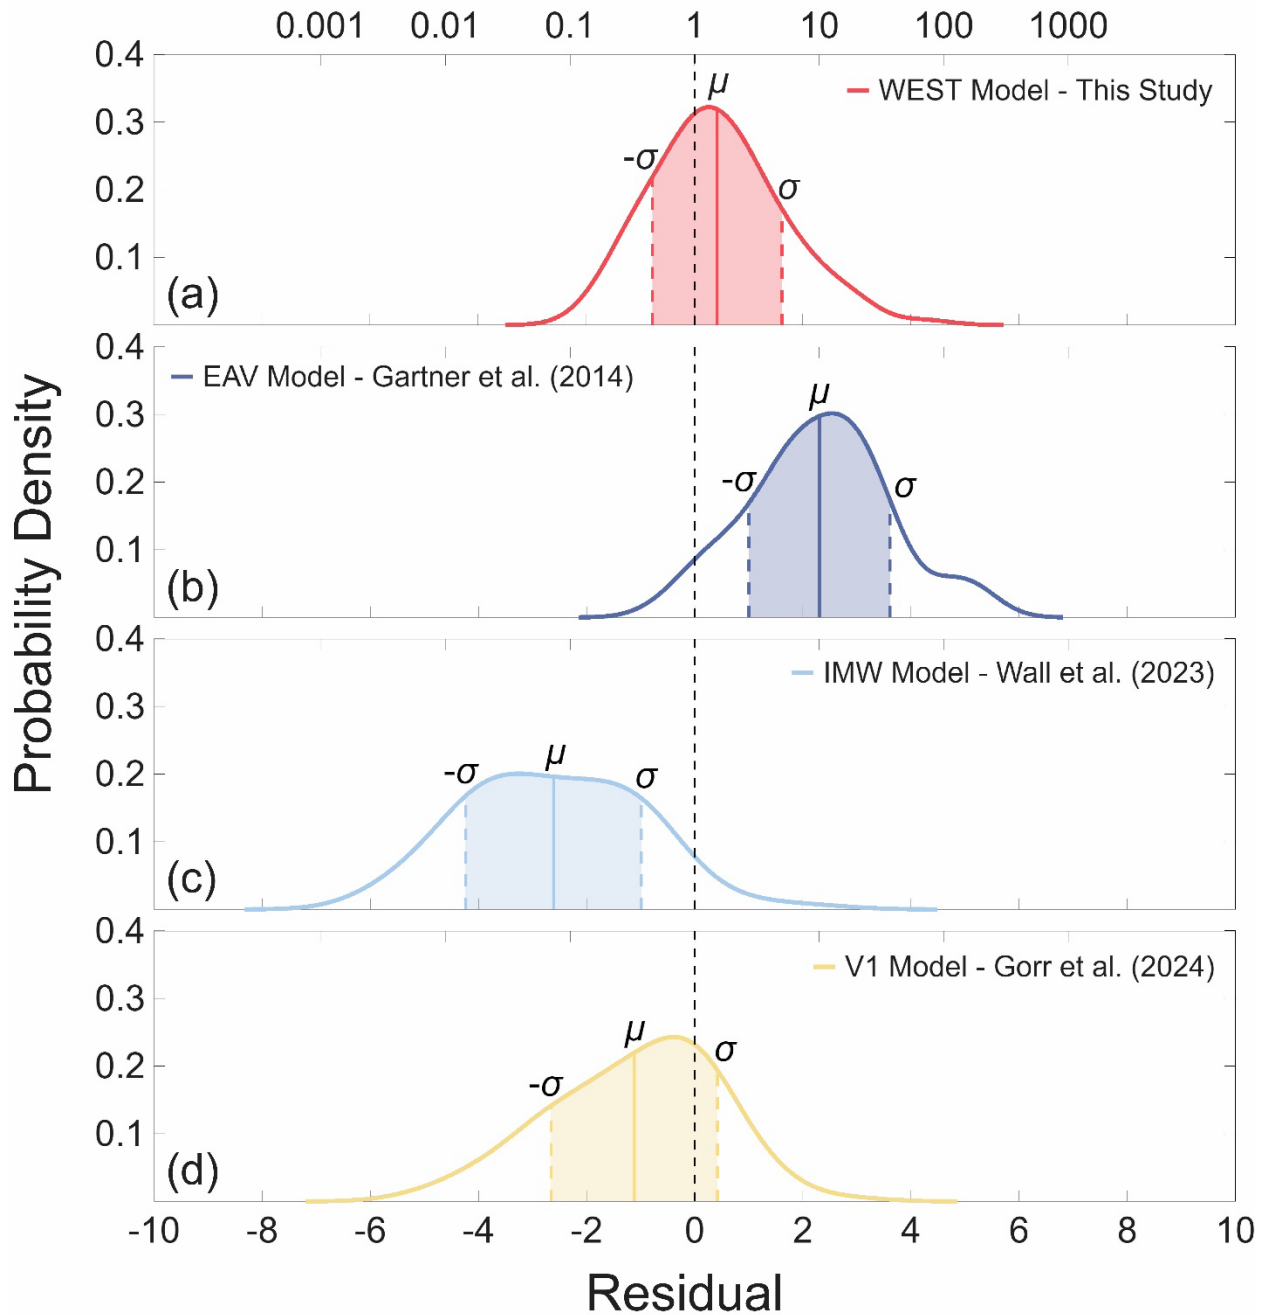

75 Figure S4: Probability density functions for the residuals of the (a) western United States (WEST), (b) Emergency Assessment volume (EAV), (c) Intermountain West (IMW), and (d) V1 models when applied to volume data from the Intermountain West.

# Southwest

## Predicted / Observed Volume

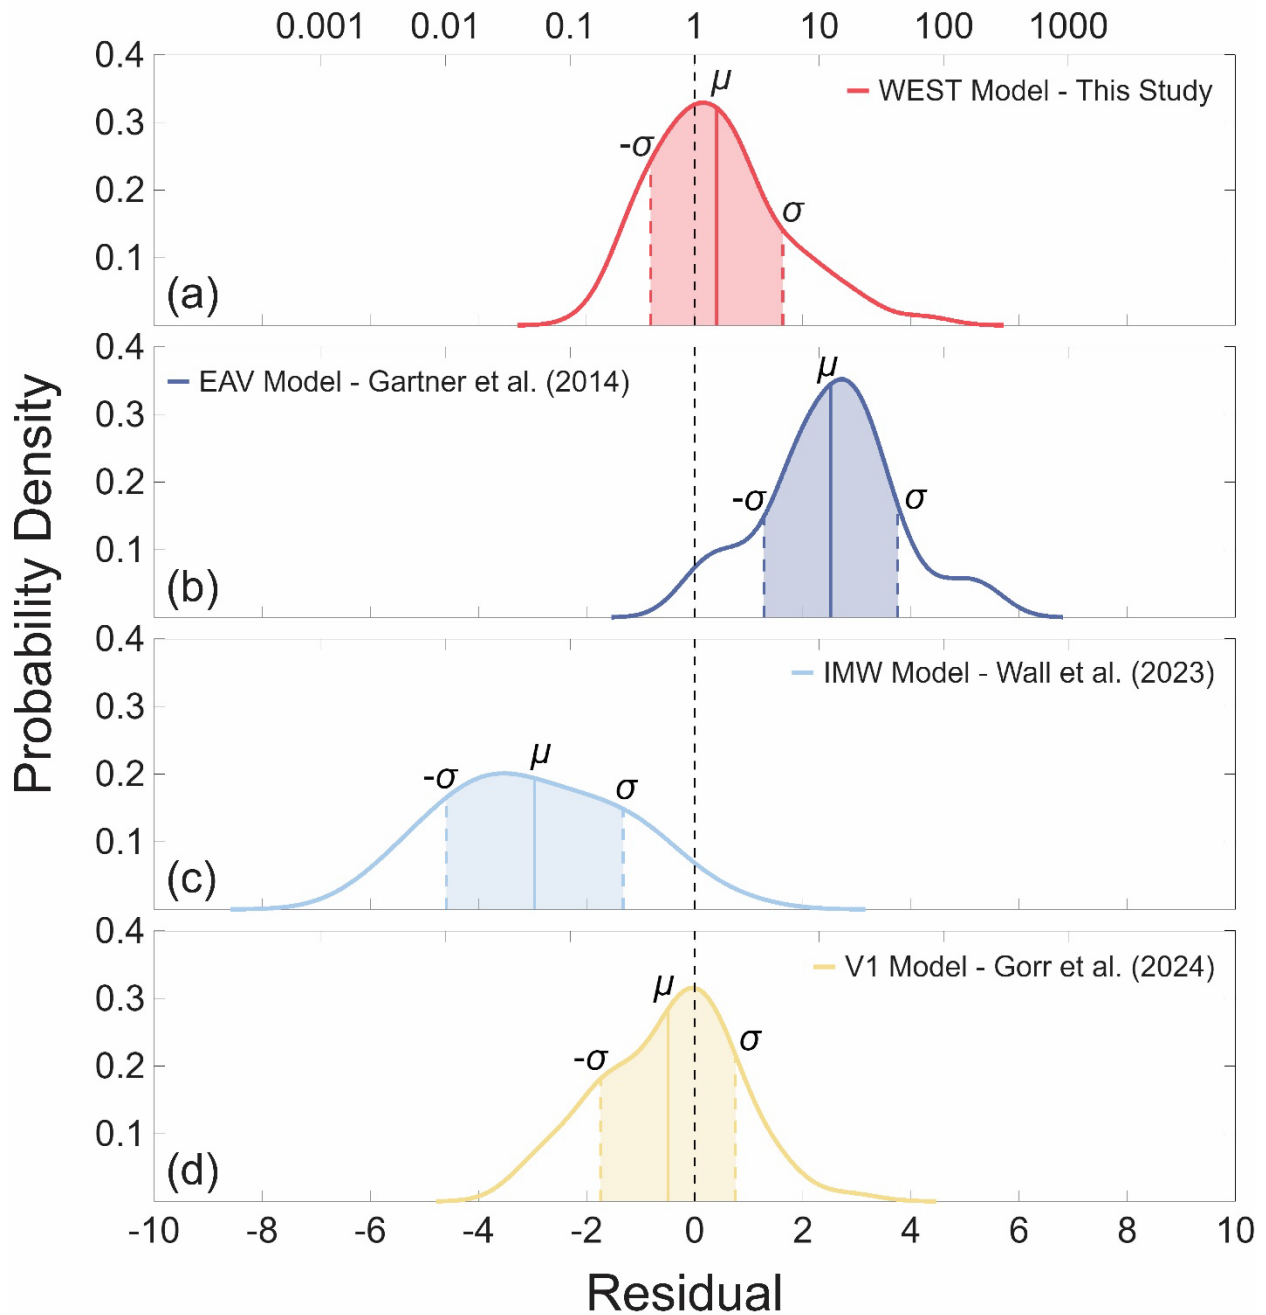

80 Figure S5: Probability density functions for the residuals of the (a) western United States (WEST), (b) Emergency Assessment volume (EAV), (c) Intermountain West (IMW), and (d) V1 models when applied to volume data from the Southwest.
